# Supplementary material for: Optical electrophysiology for probing function and pharmacology of voltage-gated ion channels
Source: eLife. 2016 May 24;5:e15202. doi: 10.7554/eLife.15202 (PMC4907688; doi:10.7554/eLife.15202)
Supplement: Figure 5—source data 1. — DOI: http://dx.doi.org/10.7554/eLife.15202.013 [file elife-15202-fig5-data1.xlsx]

## Sheet: Sheet1
positon	drug name in Broad system	Vendor	catalog NO.	name	structure	Standard deviation in Spike amp	Use dependent index
'A02'	'DMSO'	[]	[]	[]	[]	0.0563206	0.0930187
'B02'	'DMSO'	[]	[]	[]	[]	0.0535308	0.13223
'C02'	'DMSO'	[]	[]	[]	[]	0.0381958	0.0734979
'D02'	'DMSO'	[]	[]	[]	[]	0.0260745	0.0556023
'E02'	'DMSO'	[]	[]	[]	[]	0.0802941	0.15322
'F02'	'DMSO'	[]	[]	[]	[]	0.0556042	0.0717206
'G02'	'DMSO'	[]	[]	[]	[]	0.0595184	0.134025
'H02'	'DMSO'	[]	[]	[]	[]	0.0785125	0.119837
'I02'	'Amitryptyline'	[]	[]	[]	[]	0.347013	0.838721
'J02'	'Amitryptyline'	[]	[]	[]	[]	0.325321	0.852996
'K02'	'Amitryptyline'	[]	[]	[]	[]	0.303773	0.812628
'L02'	'Amitryptyline'	[]	[]	[]	[]	0.30384	0.857054
'M02'	'Amitryptyline'	[]	[]	[]	[]	0.339104	0.843199
'N02'	'Amitryptyline'	[]	[]	[]	[]	0.301205	0.783713
'O02'	'Amitryptyline'	[]	[]	[]	[]	0.327781	0.891276
'P02'	'Amitryptyline'	[]	[]	[]	[]	0.31353	0.730601
'P03'	'BRD-K83876700-001-08-4'	'InterBioScreen'	'STOCK5S-13411'	[]	'COc1ccc2[nH]c(S)nc2c1'	0.0625912	-0.00553124
'O03'	'BRD-K28550399-001-01-4'	'Sigma'	'T4827'	'Trandolapril'	'CCOC(=O)[C@H](CCc1ccccc1)N[C@@H](C)C(=O)N1[C@H]2CCCC[C@@H]2C[C@H]1C(O)=O'	0.0503875	0.0861718
'N03'	'BRD-K13281575-001-10-0'	'Sigma'	'S4026'	'Semustine'	'CC1CCC(CC1)NC(=O)N(CCCl)[N+][O-]'	0.0516861	0.0514304
'M03'	'BRD-K10845183-382-01-2'	'Sigma'	'T4580'	'Tiludronate disodium salt hydrate'	'OP(O)(=O)C(Sc1ccc(Cl)cc1)P(O)(O)=O'	0.0329918	-0.00230719
'L03'	'BRD-K01200330-001-01-9'	'Selleck'	'S1364'	'Epothilone B (EPO906)'	'C[C@H]1CCC[C@@]2(C)O[C@H]2C[C@@H](OC(=O)C[C@H](O)C(C)(C)C(=O)[C@H](C)[C@H]1O)C(C)=Cc1csc(C)n1'	0.0917083	0.0690484
'K03'	'BRD-K07202345-001-15-2'	'Vitas-M'	'STK078558'	[]	'COc1ccc2nc(NC(=O)Nc3ccccc3)sc2c1'	0.0381777	0.069826
'J03'	'BRD-A52627843-001-02-1'	'Apollo'	'BIT1003'	[]	'''CCC(C)[C@@H]1N[C@@H]2C=Cc3c(cc(nc3[C@H]2O)C(=O)O[C@H](C)[C@@H]2NC(=O)c3csc(n3)[C@@H](NC(=O)[C@H]3CSC(=N3)C(NC(=O)[C@@H](NC(=O)c3...'' <Preview truncated at 128 characters>'	0.0250401	-0.0276757
'I03'	'BRD-A69947696-236-02-4'	'InterBioScreen'	'STOCK1N-50309'	[]	'C[C@@H]1[C@H](O)CC[C@@]2(C)C1CC[C@@]1(C)[C@H]2[C@H](O)C[C@H]2C([C@H](C[C@]12C)OC(C)=O)=C(CCC=C(C)C)C(O)=O'	0.0388452	0.0778603
'H03'	'BRD-K77624155-001-01-1'	'Apollo'	'OR3570'	[]	'COC(=O)c1cc(ccc1OC)S(C)(=O)=O'	0.0572806	0.0998011
'G03'	'BRD-K12179389-001-01-2'	'Enamine'	'Z56788744'	[]	'Nc1nnnn1-c1ccccc1'	0.0391228	0.0807157
'F03'	'BRD-K64298650-300-01-5'	'Sigma'	'B4563'	'Bisantrene dihydrochloride'	'C1CN=C(NN=Cc2c3ccccc3c(C=NNC3=NCCN3)c3ccccc23)N1'	0.0384252	0.0561593
'E03'	'BRD-K27721098-065-05-2'	'InterBioScreen'	'STOCK5S-27782'	[]	'COC(=O)[C@@H](N1CCc2sccc2C1)c1ccccc1Cl'	0.0172599	0.0306232
'D03'	'BRD-K43457670-001-22-9'	'PrincetonBio'	'OSSL_298318'	[]	'CC(=O)Nc1nnc(s1)S(N)(=O)=O'	0.0287719	-0.0173598
'C03'	'BRD-A37760374-001-01-9'	'Vitas-M'	'STL263249'	[]	'CON=C(C(=O)NC1C2SCC(CSc3nc(=O)c(=O)[nH]n3C)=C(N2C1=O)C(O)=O)c1csc(N)n1'	0.0563308	0.0930729
'B03'	'BRD-A33447119-001-05-8'	'PrincetonBio'	'OSSL_133904'	[]	'COC(=O)Nc1nc2ccc(cc2[nH]1)S(=O)c1ccccc1'	0.0623531	0.115787
'A03'	'BRD-K13240081-001-04-6'	'Vitas-M'	'STK644766'	[]	'Cc1ncc(CNC(=O)N(CCCl)[N+][O-])c(N)n1'	0.088412	-0.189209
'A04'	'BRD-A32597168-001-01-0'	'AKSci'	'R082'	'Letosteine'	'CCOC(=O)CSCCC1NC(CS1)C(O)=O'	0.0324919	0.0588974
'B04'	'BRD-K81418486-001-13-7'	'Toronto'	'S688700'	'suberoylanilide hydroxamic acid'	'ONC(=O)CCCCCCC(=O)Nc1ccccc1'	0.0675556	0.102934
'C04'	'BRD-K23967983-001-01-7'	'ChemDiv'	'8019-8264'	[]	'Clc1ccc2Oc3ccccc3C(=O)Nc2c1'	0.0517087	0.0816443
'D04'	'BRD-K17068645-003-02-6'	'Selleck'	'S1212'	'Bendamustine Hydrochloride'	'Cn1c(CCCC(O)=O)nc2cc(ccc12)N(CCCl)CCCl'	0.0516576	0.0923645
'E04'	'BRD-A90308151-001-01-0'	'Abblis'	'AB2000289'	'Trifluridine'	'OC[C@H]1O[C@H](CC1O)n1cc(c(=O)[nH]c1=O)C(F)(F)F'	0.03981	-0.0498662
'F04'	'BRD-K15108141-001-04-1'	'Selleck'	'S1714'	'Gemcitabine'	'Nc1ccn([C@@H]2O[C@H](CO)[C@@H](O)C2(F)F)c(=O)n1'	0.0403577	-0.0867367
'G04'	'BRD-K77564118-001-01-5'	'ChemDiv'	'8561-06375'	[]	'O=C(CN1CCN(Cc2ccc3OCOc3c2)CC1)N1c2ccccc2Sc2ccccc12'	0.167828	0.300198
'H04'	'BRD-K78431006-001-03-7'	'Selleck'	'S1068'	'Crizotinib'	'C[C@@H](Oc1cc(cnc1N)-c1cnn(c1)C1CCNCC1)c1c(Cl)ccc(F)c1Cl'	0.0190467	0.00544386
'I04'	'BRD-A17188005-001-01-4'	'Enamine'	'Z1142553433'	[]	'COc1ccc2nccc([C@H](O)C3CC4CCN3CC4C=C)c2c1'	0.262193	0.299435
'J04'	'BRD-A69095630-001-01-1'	'Sigma'	'T8200'	'Tofisopam'	'CCC1c2cc(OC)c(OC)cc2C(=NN=C1C)c1ccc(OC)c(OC)c1'	0.0931076	0.0806257
'K04'	'BRD-K17023466-001-01-3'	'Axon'	[]	'(R)-(+)-3-(4-chlorophenyl)-N''-(4-chlorophenylsulfonyl)-N-methyl-4-phenyl-4,5-dihydro-1H-pyrazole-1-carboximidamide'	'CNC(=NS(=O)(=O)c1ccc(Cl)cc1)N1C[C@@H](C(=N1)c1ccc(Cl)cc1)c1ccccc1'	0.0263202	-0.0299892
'L04'	'BRD-K33563430-001-02-9'	'Sigma'	[]	'Ciclobendazole'	'COC(=O)Nc1nc2cc(ccc2[nH]1)C(=O)C1CC1'	0.0514939	-0.00457251
'M04'	'BRD-A14973529-001-01-9'	'Enzo'	'ALX-350-286'	'Resibufogenin'	'C[C@]12CC[C@H]3[C@@H](CC[C@@H]4C[C@@H](O)CC[C@]34C)C11O[C@@H]1C[C@@H]2c1ccc(=O)oc1'	0.32617	0.38159
'N04'	'BRD-A22140731-003-01-5'	'Toronto'	'N661460'	'Nor Cisapride Hydrochloride'	'COC1CNCC[C@H]1NC(=O)c1cc(Cl)c(N)cc1OC'	0.0304916	0.0523416
'O04'	'BRD-A93255169-001-04-4'	'MicroSource'	[]	'THALIDOMIDE'	'O=C1N(C2CCC(=O)NC2=O)C(=O)c2ccccc12'	0.0568814	0.0853658
'P04'	'BRD-K92872987-236-01-3'	'AKSci'	'K279'	'Cefpiramide sodium'	'Cc1cc(O)c(cn1)C(=O)N[C@@H](C(=O)N[C@H]1[C@H]2SCC(CSc3nnnn3C)=C(N2C1=O)C(O)=O)c1ccc(O)cc1'	0.0603262	0.0971633
'P05'	'BRD-K70366318-001-04-4'	'Sigma'	'S1014'	'Streptonigrin from Streptomyces flocculus'	'COc1ccc(c(O)c1OC)-c1c(C)c(nc(-c2ccc3C(=O)C(OC)=C(N)C(=O)c3n2)c1N)C(O)=O'	0.0468007	0.111235
'O05'	'BRD-K68693535-001-01-8'	'ChemDiv'	'8009-0514'	[]	'CNC(=N)NC(=O)Nc1c(C)cccc1C'	0.033837	-0.0331256
'N05'	'BRD-K70163715-001-02-8'	'LifeChem'	'F9995-0196'	[]	'Clc1ccc(Nc2nnc(Cc3ccncc3)c3ccccc23)cc1'	0.0977233	0.144031
'M05'	'BRD-K59986511-001-02-3'	'PrincetonBio'	'OSSL_476744'	[]	'O=C(OOC(=O)c1ccccc1)c1ccccc1'	0.0381394	0.0318228
'L05'	'BRD-K51486818-002-01-2'	'Sigma'	'SML0042'	'Lazabemide hydrate'	'NCCNC(=O)c1ccc(Cl)cn1'	0.0294395	0.00684159
'K05'	'BRD-A75368507-001-03-0'	'ChemDiv'	'8013-0784'	[]	'CN(C)C1C2CC3C(O)c4c(Cl)ccc(O)c4C(=O)C3C(=O)C2(O)C(=O)C(C(N)=O)C1=O'	0.0638214	0.154513
'J05'	'BRD-K00566342-001-01-0'	'Abblis'	'AB1009475'	'myo-Inositol hexanicotinate'	'O=C(OC1C(OC(=O)c2cccnc2)C(OC(=O)c2cccnc2)C(OC(=O)c2cccnc2)C(OC(=O)c2cccnc2)C1OC(=O)c1cccnc1)c1cccnc1'	0.0196698	-0.0264076
'I05'	'BRD-K79714066-001-01-6'	'Enamine'	'Z104477028'	[]	'Clc1ccc2NC(=O)Cc2c1'	0.033443	-0.0284552
'H05'	'BRD-A36229684-065-01-6'	'Abblis'	'AB2000116'	'Atazanavir sulfate'	'COC(=O)NC(C(=O)N[C@@H](Cc1ccccc1)C(O)CN(Cc1ccc(cc1)-c1ccccn1)NC(=O)C(NC(=O)OC)C(C)(C)C)C(C)(C)C'	0.455899	0.565091
'G05'	'BRD-K90727284-001-01-9'	'Enamine'	'Z46160202'	[]	'Cc1cccc(C)c1NC(=O)CN1CCCCCC1'	0.134823	0.161147
'F05'	'BRD-A80903626-001-01-7'	'PrincetonBio'	'OSSL_039149'	[]	'CCCCNCC1COc2ccccc2O1'	0.263304	0.297376
'E05'	'BRD-K45216060-001-06-8'	'Enamine'	'Z104474598'	[]	'COc1ccc(O)cc1'	0.0535324	0.102948
'D05'	'BRD-K54416256-001-15-7'	'Vitas-M'	'STK802184'	[]	'Cn1cc[nH]c1=S'	0.0306311	0.0431106
'C05'	'BRD-A56084804-001-01-0'	'InterBioScreen'	'STOCK1N-09917'	[]	'C[C@]12CCC3C(CCc4cc(OC(=O)c5ccccc5)ccc34)C1CCC2O'	0.050909	-0.0701253
'B05'	'BRD-K66896231-001-06-5'	'ChemDiv'	'8003-7752'	[]	'Nc1c2CCCc2nc2CCCCc12'	0.0382234	0.0520318
'A05'	'BRD-K08806317-103-02-5'	'Enamine'	'Z812517470'	[]	'CC(C)(C)NC[C@H](O)COc1nsnc1N1CCOCC1'	0.120119	0.204777
'A06'	'BRD-K84257395-001-01-1'	'AlfaAesar'	'H54498'	'Quinuclidine, 97+%'	'C1CN2CCC1CC2'	0.196028	0.238283
'B06'	'BRD-K76674262-001-02-5'	'Tocris'	[]	'homoharringtonine'	'COC(=O)C[C@](O)(CCCC(C)(C)O)C(=O)O[C@H]1[C@H]2c3cc4OCOc4cc3CCN3CCC[C@]23C=C1OC'	0.0281146	0.0405611
'C06'	'BRD-K21452876-001-01-2'	'Maybridge'	'RJF00584'	[]	'Nc1ncnc(Nc2ccc(Cl)cc2)n1'	0.0558799	0.118842
'D06'	'BRD-K50071428-001-01-7'	'Selleck'	'S1123'	'Abiraterone(CB-7598)'	'C[C@]12CC[C@H]3[C@@H](CC=C4C[C@@H](O)CC[C@]34C)[C@@H]1CC=C2c1cccnc1'	0.0315207	0.0416253
'E06'	'BRD-K96586944-001-01-5'	'Abblis'	'AB1004790'	'1-Deoxy-1-(octylamino)-D-glucitol'	'CCCCCCCCNC[C@@H](O)[C@H](O)[C@@H](O)[C@@H](O)CO'	0.0370088	0.0185741
'F06'	'BRD-A70155556-001-03-6'	'AnalytiCon'	'NP-001236'	[]	'CCC(C)C(=O)OC1CC(C)C=C2C=CC(C)C(CCC(O)CC(O)CC(O)=O)C12'	0.0661028	0.0726502
'G06'	'BRD-K99124663-001-01-1'	'ChemDiv'	'6623-0087'	[]	'CCN(CC)CCC(=O)N1c2ccccc2Sc2ccc(Cl)cc12'	0.0940338	0.143235
'H06'	'BRD-K92093830-003-25-8'	'Selleck'	'S1208'	'Doxorubicin'	'COc1cccc2C(=O)c3c(O)c4C[C@](O)(C[C@H](O[C@H]5C[C@H](N)[C@H](O)[C@H](C)O5)c4c(O)c3C(=O)c12)C(=O)CO'	0.0328511	0.00914801
'I06'	'BRD-K97939847-001-08-8'	'ChemBridge'	[]	[]	'OC(=O)Cn1c2ccccc2c(=O)c2ccccc12'	0.0198919	-0.0192851
'J06'	'BRD-K35458079-001-23-2'	'Enamine'	'Z50145861'	[]	'CC1=NN(C(=O)C1)c1ccccc1'	0.0948248	-0.170302
'K06'	'BRD-K97616436-001-01-4'	'AlfaAesar'	'L13597'	'1-n-Hexyltheobromine, 98+%'	'CCCCCCn1c(=O)n(C)c2ncn(C)c2c1=O'	0.0478899	0.0690307
'L06'	'BRD-K01402789-001-01-7'	'Toronto'	'N389830'	'trans-Nemonapride'	'CNc1cc(OC)c(cc1Cl)C(=O)N[C@@H]1CCN(Cc2ccccc2)[C@H]1C'	0.325094	0.378926
'M06'	'BRD-K59369769-001-14-6'	'Axon'	[]	'Cyclopropanecarboxylic acid {4-[4-(4-methyl-piperazin-1-yl)-6-(5-methyl-1H-pyrazol-3-ylamino)-pyrimidin-2'	'CN1CCN(CC1)c1cc(Nc2cc(C)[nH]n2)nc(Sc2ccc(NC(=O)C3CC3)cc2)n1'	0.0625758	0.121775
'N06'	'BRD-K54262262-001-06-6'	'Enamine'	'Z104478412'	[]	'Oc1ccc(OCc2ccccc2)cc1'	0.0713618	0.0993857
'O06'	'BRD-K34157611-001-07-9'	'MicroSource'	[]	'CIMETIDINE'	'CN\C(NCCSCc1nc[nH]c1C)=N/C#N'	0.0434298	0.0703835
'P06'	'BRD-K49338325-001-01-8'	'AKSci'	'V1802'	'Etofibrate'	'CC(C)(Oc1ccc(Cl)cc1)C(=O)OCCOC(=O)c1cccnc1'	0.147238	0.271316
'P07'	'BRD-K01292611-003-13-7'	'ChemImpex'	[]	'5-Aminolevulinic acid methyl ester hydrochloride'	'COC(=O)CCC(=O)CN'	0.0520492	0.096664
'O07'	'BRD-K60160658-003-08-8'	'Sigma'	'SML0035'	'Tiagabine hydrochloride'	'Cc1ccsc1C(=CCCN1CCC[C@H](C1)C(O)=O)c1sccc1C'	0.200973	0.375558
'N07'	'BRD-K99514692-001-06-7'	'Sigma'	[]	'6-O-Methylguanine'	'COc1[nH]c(N)nc2ncnc12'	0.0620318	0.111061
'M07'	'BRD-K69857269-001-01-0'	'Sigma'	'PZ0174'	'Sonepiprazole hydrate'	'NS(=O)(=O)c1ccc(cc1)N1CCN(CC[C@@H]2OCCc3ccccc23)CC1'	0.0422596	0.0387466
'L07'	'BRD-A22791329-001-06-6'	'InterBioScreen'	'STOCK1N-05019'	[]	'CC(=O)O[C@@]1(CCC2C3C=C(C)C4=CC(=O)CC[C@]4(C)C3CC[C@]12C)C(C)=O'	0.181111	0.21959
'K07'	'BRD-K09711437-001-01-9'	'Selleck'	'S1110'	'Varespladib (LY315920)'	'CCc1c(C(=O)C(N)=O)c2c(OCC(O)=O)cccc2n1Cc1ccccc1'	0.0547734	0.123836
'J07'	'BRD-K87202646-001-26-8'	'LifeChem'	'F0391-0007'	[]	'NNC(=O)c1ccncc1'	0.0185838	0.0235963
'I07'	'BRD-K35170555-001-07-9'	'Enamine'	'Z104495238'	[]	'CCCCCCCC(O)=O'	0.0600804	0.139409
'H07'	'BRD-K99451608-001-02-4'	'Selleck'	'S1380'	'Lopinavir (ABT-378)'	'CC(C)[C@H](N1CCCNC1=O)C(=O)N[C@H](C[C@H](O)[C@H](Cc1ccccc1)NC(=O)COc1c(C)cccc1C)Cc1ccccc1'	0.394971	0.420987
'G07'	'BRD-K35586044-003-11-3'	'InterBioScreen'	'STOCK1N-51304'	[]	'COC(=O)[C@H]1[C@@H](O)CC[C@H]2CN3CCc4c([nH]c5ccccc45)[C@@H]3C[C@H]12'	0.0718458	0.055623
'F07'	'BRD-A92412021-003-01-2'	'Sigma'	'B1385'	'Butoxamine hydrochloride'	'COc1ccc(OC)c(c1)C(O)C(C)NC(C)(C)C'	0.0599214	0.0599675
'E07'	'BRD-K31002570-001-01-2'	'Enamine'	'Z44608704'	[]	'FC(F)(F)c1cc(NC(=O)Nc2ccc(Cl)cc2)ccc1Cl'	0.0246014	-0.0117824
'D07'	'BRD-K97884852-001-02-1'	'Selleck'	'S1137'	'Malotilate'	'CC(C)OC(=O)C(C(=O)OC(C)C)=C1SC=CS1'	0.0316629	-0.0115026
'C07'	'BRD-K96159438-001-03-0'	'Vitas-M'	'STL257088'	[]	'CC(C)(C)C(=O)OCOP(=O)(COCCn1cnc2c(N)ncnc12)OCOC(=O)C(C)(C)C'	0.015144	-0.00385469
'B07'	'BRD-K93862950-001-07-1'	'PrincetonBio'	'OSSK_368670'	[]	'[O-][N+](=O)c1cnc(NC(=O)c2cccs2)s1'	0.0935839	0.205042
'A07'	'BRD-A12896037-001-02-7'	'Vitas-M'	'STL058624'	[]	'COC1CN(CCCOc2ccc(F)cc2)CCC1NC(=O)c1cc(Cl)c(N)cc1OC'	0.0349252	0.070857
'A08'	'BRD-K24023109-003-20-3'	'Abblis'	'AB2000340'	'Diltiazem HCl'	'COc1ccc(cc1)[C@@H]1Sc2ccccc2N(CCN(C)C)C(=O)[C@@H]1OC(C)=O'	0.0592885	0.0786657
'B08'	'BRD-K84466663-001-01-3'	'Selleck'	'S1213'	'Nelarabine'	'COc1nc(N)nc2n(cnc12)[C@@H]1O[C@H](CO)[C@@H](O)[C@@H]1O'	0.0568853	0.0899515
'C08'	'BRD-A90558273-001-01-3'	'ChemDiv'	'N001-0009'	[]	'COC1C(O)CC(OC2C(O)CC(OC3C(O)CC(OC4CCC5(C)C(CCC6[C@@H]5CC(O)C5(C)C(CCC65O)C5=CC(=O)OC5)C4)OC3C)OC2C)OC1C'	0.239892	0.276802
'D08'	'BRD-A05821830-001-01-5'	'Selleck'	'S1148'	'Docetaxel'	'''CC(=O)O[C@@]12CO[C@@H]1C[C@H](O)[C@]1(C)C2[C@H](OC(=O)c2ccccc2)[C@]2(O)C[C@H](OC(=O)[C@H](O)[C@@H](NC(=O)OC(C)(C)C)c3ccccc3)C(C)...'' <Preview truncated at 128 characters>'	0.11341	0.00249375
'E08'	'BRD-K28346421-001-02-7'	'AKSci'	[]	'Rifapentine'	'''CO[C@H]1\C=C\O[C@@]2(C)Oc3c(C2=O)c2c(O)c(\C=N\N4CCN(CC4)C4CCCC4)c(NC(=O)\C(C)=C/C=C/[C@H](C)[C@H](O)[C@@H](C)[C@@H](O)[C@@H](C)[...'' <Preview truncated at 128 characters>'	0.0290941	-0.00102663
'F08'	'BRD-K88510285-001-02-0'	'Toronto'	'B675700'	'Bortezomib'	'CC(C)C[C@H](NC(=O)[C@H](Cc1ccccc1)NC(=O)c1cnccn1)B(O)O'	0.025568	0.0293845
'G08'	'BRD-K28405228-001-01-8'	'ChemDiv'	'1630-0698'	[]	'CCOC(=O)c1c(C)n(C)c2ccc(O)cc12'	0.0261562	0.024966
'H08'	'BRD-K59670716-001-06-7'	'Sigma'	'M0440'	'Mitomycin C'	'CO[C@]12[C@H]3N[C@H]3CN1C1=C([C@H]2COC(N)=O)C(=O)C(N)=C(C)C1=O'	0.0088634	-0.0125726
'I08'	'BRD-K23850772-001-01-0'	'Enamine'	'Z839048042'	[]	'Oc1c(I)cc(cc1[N+]([O-])=O)C#N'	0.0555483	0.00440482
'J08'	'BRD-K93631643-065-01-1'	'InterBioScreen'	'STOCK1N-06824'	[]	'CN(C)CCc1ccc(O)cc1'	0.0382243	0.00081832
'K08'	'BRD-K28578425-001-04-7'	'Enzo'	'BML-PD125'	'Cilostamide'	'CN(C1CCCCC1)C(=O)CCCOc1ccc2[nH]c(=O)ccc2c1'	0.0591978	0.0147905
'L08'	'BRD-K19456237-001-22-7'	'Enamine'	'Z56865289'	[]	'NC(=O)CN1CCCC1=O'	0.0480172	0.0803399
'M08'	'BRD-K35520305-001-04-5'	'MicroSource'	[]	'DACARBAZINE'	'CN(C)\N=N\c1[nH]cnc1C(N)=O'	0.0624669	0.112694
'N08'	'BRD-K40096621-001-01-2'	'Ark'	'AK-43718'	'8-[(E)-2-(3,4-Dimethoxyphenyl)ethenyl]-1,3-diethyl-7-methyl-purine-2,6 -dione'	'CCn1c2nc(C=Cc3ccc(OC)c(OC)c3)n(C)c2c(=O)n(CC)c1=O'	0.097085	0.0235745
'O08'	'BRD-A35108200-001-04-7'	'Tocris'	[]	'Dexamethasone'	'CC1CC2C3CCC4=CC(=O)C=CC4(C)C3(F)C(O)CC2(C)C1(O)C(=O)CO'	0.0740768	-0.025396
'P08'	'BRD-K05195669-001-06-7'	'ChemDiv'	'8018-1694'	[]	'Cn1cnc(c1Cl)[N+]([O-])=O'	0.071186	0.124721
'P09'	'BRD-K31092604-003-01-9'	'Sigma'	'D9071'	'Donitriptan monohydrochloride'	'NCCc1c[nH]c2ccc(OCC(=O)N3CCN(CC3)c3ccc(cc3)C#N)cc12'	0.0368194	0.031218
'O09'	'BRD-K62472267-001-01-7'	'InterBioScreen'	'STOCK1S-71629'	[]	'CCOC(=O)C(=N\O)\c1csc(N)n1'	0.055517	0.106493
'N09'	'BRD-A69950438-001-11-0'	'ChemDiv'	'N036-0108'	[]	'COc1ccc2CC3N(CCc4cc5OCOc5cc34)Cc2c1OC'	0.0275979	-0.0150211
'M09'	'BRD-A21280314-001-02-7'	'Enamine'	'Z56755859'	[]	'CC(C)NCC(O)c1ccc(cc1)[N+]([O-])=O'	0.0317881	-0.0193685
'L09'	'BRD-K99964838-001-06-9'	'Toronto'	'B676095'	'Bosutinib'	'COc1cc(Nc2c(cnc3cc(OCCCN4CCN(C)CC4)c(OC)cc23)C#N)c(Cl)cc1Cl'	0.0466972	-0.0070795
'K09'	'BRD-K70161083-003-01-4'	'Sigma'	'C1119'	'Caroverine hydrochloride'	'CCN(CC)CCn1c2ccccc2nc(Cc2ccc(OC)cc2)c1=O'	0.0336482	0.0409626
'J09'	'BRD-K26634474-001-01-6'	'ChemDiv'	'8018-2842'	[]	'Sc1ncnc2[nH]ncc12'	0.0379706	-0.0273862
'I09'	'BRD-K06335600-003-16-5'	'Enamine'	'Z594284192'	[]	'Clc1ccc2nsnc2c1NC1=NCCN1'	0.0434899	-0.0453976
'H09'	'BRD-K19416115-001-03-8'	'AKSci'	'X4663'	'Sitagliptin'	'N[C@@H](CC(=O)N1CCn2c(C1)nnc2C(F)(F)F)Cc1cc(F)c(F)cc1F'	0.049477	0.0982366
'G09'	'BRD-A62326914-003-06-9'	'Enamine'	'Z234895379'	[]	'Fc1ccc(cc1)C1CCNCC1COc1ccc2OCOc2c1'	0.13377	0.175946
'F09'	'BRD-K87107150-075-01-4'	'LifeChem'	'F9995-0076'	[]	'CCN1C(=CC=Cc2ccc3ccccc3[n+]2CC)C=Cc2ccccc12'	0.517549	-0.428571
'E09'	'BRD-A41304429-001-12-2'	'Enamine'	'Z274728816'	[]	'CC(C)NCC(O)COc1ccc(NC(C)=O)cc1'	0.038251	0.0607829
'D09'	'BRD-K54142781-003-08-4'	'Sigma'	'C223'	'Cirazoline hydrochloride'	'C(Oc1ccccc1C1CC1)C1=NCCN1'	0.0356743	0.0403165
'C09'	'BRD-K18613660-001-01-4'	'InterBioScreen'	'STOCK6S-58266'	[]	'COc1ccc(C(=O)c2ccc(C)cc2)c(O)c1'	0.177532	0.113346
'B09'	'BRD-K04643877-001-01-6'	'Sigma'	'SML0206'	'EAA-090'	'OP(O)(=O)CCN1CCCNc2c1c(=O)c2=O'	0.0432334	-0.0191903
'A09'	'BRD-A92341659-001-01-6'	'Vitas-M'	'STK626148'	[]	'CC1Sc2c(C(O)=O)c(=O)c3cc(F)c(cc3n12)N1CCN(Cc2oc(=O)oc2C)CC1'	0.0530795	0.0182344
'A10'	'BRD-K75958547-001-01-2'	'AKSci'	[]	'Pitavastatin calcium'	'O[C@H](C[C@H](O)\C=C\c1c(nc2ccccc2c1-c1ccc(F)cc1)C1CC1)CC(O)=O'	0.0637098	0.0976181
'B10'	'BRD-K81528515-001-04-7'	'Selleck'	'S1033'	'Nilotinib'	'Cc1cn(cn1)-c1cc(NC(=O)c2ccc(C)c(Nc3nccc(n3)-c3cccnc3)c2)cc(c1)C(F)(F)F'	0.0440498	-0.0969091
'C10'	'BRD-K74282937-001-01-6'	'Ark'	'AK110729'	'2-(2H-Benzo[d][1,2,3]triazol-2-yl)-4-(2,4,4-trimethylpentan-2-yl)phenol'	'CC(C)(C)CC(C)(C)c1ccc(O)c(c1)-n1nc2ccccc2n1'	0.0414937	0.00334444
'D10'	'BRD-A52530402-001-01-2'	'Tocris'	[]	'fluvastatin'	'CC(C)N1C(\C=C\C(O)CC(O)CC(O)=O)C(c2ccccc12)c1ccc(F)cc1'	0.101549	0.0130212
'E10'	'BRD-K58787433-001-12-0'	'Maybridge'	'SB01489'	[]	'C[C@H]1[C@@H]2CC[C@@]3(C)C=CC(=O)C(C)=C3[C@H]2OC1=O'	0.0378891	-0.00312651
'F10'	'BRD-K03406345-001-02-1'	'MicroSource'	[]	'AZACITIDINE'	'Nc1ncn([C@@H]2O[C@H](CO)[C@@H](O)[C@H]2O)c(=O)n1'	0.021323	-0.047486
'G10'	'BRD-A90642009-001-01-6'	'ChemDiv'	'6623-1980'	[]	'OC1COC(Nc2ccc(cc2)C(O)=O)C(O)C1O'	0.0223729	0.0019028
'H10'	'BRD-K97799481-001-12-9'	'Enamine'	'Z104500218'	[]	'Cn1c2nc[nH]c2c(=O)n(C)c1=O'	0.0327699	-0.0370649
'I10'	'BRD-K04844308-001-07-6'	'ChemBridge'	[]	[]	'COc1ccc(cc1)S(=O)(=O)Nc1nnc(CC(C)C)s1'	0.0313448	-0.0327559
'J10'	'BRD-K30114692-001-10-0'	'Enamine'	'Z56795955'	[]	'C1N2CN3CN1CN(C2)C3'	0.0253365	0.0302147
'K10'	'BRD-K42991124-001-01-4'	'Ark'	'AK-51337'	'2-(1-Methylguanidino)ethyl dihydrogen phosphate'	'CN(CCOP(O)(O)=O)C(N)=N'	0.0337452	0.0124455
'L10'	'BRD-K70592963-001-21-7'	'ChemDiv'	'0096-0301'	[]	'O=C1C(C(=O)c2ccccc12)c1ccccc1'	0.021748	-0.0301569
'M10'	'BRD-A09722536-002-02-4'	'MicroSource'	[]	'CYCLOPHOSPHAMIDE HYDRATE'	'ClCCN(CCCl)P1(=O)NCCCO1'	0.0657899	0.0235774
'N10'	'BRD-A34462049-001-05-1'	'Abblis'	'AB2000089'	'Tigecycline'	'CN(C)[C@H]1[C@@H]2C[C@@H]3Cc4c(cc(NC(=O)CNC(C)(C)C)c(O)c4C(=O)C3C(=O)[C@]2(O)C(=O)C(C(N)=O)C1=O)N(C)C'	0.0157236	0.00396112
'O10'	'BRD-K69172251-001-01-4'	'Tocris'	[]	'Cisplatin'	'N[Pt](N)(Cl)Cl'	0.206425	0.468323
'P10'	'BRD-K58664068-001-01-6'	'ChemBridge'	[]	[]	'CC(C)C(=O)Nc1cccc(c1)C(F)(F)F'	0.0349231	-0.0285788
'P11'	'BRD-K48722833-001-02-7'	'Abblis'	'AB2000121'	'Iloperidone'	'COc1cc(ccc1OCCCN1CCC(CC1)c1noc2cc(F)ccc12)C(C)=O'	0.286546	0.334268
'O11'	'BRD-A20742938-036-01-1'	'Sigma'	'C1618'	'Cibenzoline succinate'	'C1C(C2=NCCN2)C1(c1ccccc1)c1ccccc1'	0.141189	0.138862
'N11'	'BRD-K79501723-003-09-1'	'Toronto'	'C987805'	'Cyclizine Hydrochloride'	'CN1CCN(CC1)C(c1ccccc1)c1ccccc1'	0.334438	0.38284
'M11'	'BRD-K85003644-001-01-7'	'Enamine'	'Z436079870'	[]	'CNC(NCc1ccc(OC)cc1)=NC'	0.0309539	-0.0210198
'L11'	'BRD-K68996996-001-01-7'	'Sigma'	'C3490'	'Cyclofenil'	'CC(=O)Oc1ccc(cc1)C(=C1CCCCC1)c1ccc(OC(C)=O)cc1'	0.0357113	-0.0257141
'K11'	'BRD-K99107520-001-18-3'	'Sigma'	'F0778'	'Felbamate'	'NC(=O)OCC(COC(N)=O)c1ccccc1'	0.0420923	0.0102665
'J11'	'BRD-K03277473-001-01-2'	'TCI'	'D1760'	'Isoamyl 4-(Dimethylamino)benzoate'	'CC(C)CCOC(=O)c1ccc(cc1)N(C)C'	0.0420076	0.00190972
'I11'	'BRD-K97360717-001-07-6'	'Enamine'	'Z56821717'	[]	'C1CN(CCO1)Sc1nc2ccccc2s1'	0.0267322	-0.0308655
'H11'	'BRD-A95683721-001-01-2'	'Axon'	[]	'8-(Hexahydro-2,5-methanopentalen-3a(1H)-yl)-3,7-dihydro-1,3-dipropyl-1H-purine-2,6-dione'	'CCCn1c2nc([nH]c2c(=O)n(CCC)c1=O)C12CC3CC1CC(C2)C3'	0.033965	-0.0520565
'G11'	'BRD-A43673346-311-07-1'	'InterBioScreen'	'STOCK1N-31150'	[]	'CCC[C@@H]1C[C@H](N(C)C1)C(=O)NC(C(C)Cl)[C@H]1O[C@H](SC)[C@H](O)[C@@H](O)[C@H]1O'	0.0540355	-0.0789007
'F11'	'BRD-A07932845-066-08-9'	'Sigma'	'M149'	'Methiothepin mesylate salt'	'CSc1ccc2Sc3ccccc3CC(N3CCN(C)CC3)c2c1'	0.049218	0.0611944
'E11'	'BRD-K32060394-001-01-3'	'Enamine'	'Z199040764'	[]	'CCC[C@@H](N[C@@H](C)C(=O)N1[C@H]2CCCC[C@H]2C[C@@H]1C(O)=O)C(=O)OCC'	0.045702	-0.0291561
'D11'	'BRD-K47710001-001-01-1'	'Sigma'	'Z4527'	'Zopolrestat'	'OC(=O)Cc1nn(Cc2nc3cc(ccc3s2)C(F)(F)F)c(=O)c2ccccc12'	0.0303273	-0.0199526
'C11'	'BRD-A00604004-001-01-0'	'Vitas-M'	'STL069542'	[]	'OC(CCl)CN1CC[N+]2(CC1)CC[N+]1(CCN(CC(O)CCl)CC1)CC2'	0.0248766	-0.0167125
'B11'	'BRD-A04463212-015-01-5'	'Toronto'	'B689740'	'Buserelin Acetate'	'''CCNC(=O)[C@@H]1CCCN1C(=O)[C@H](CCCNC(N)=N)NC(=O)[C@H](CC(C)C)NC(=O)[C@@H](COC(C)(C)C)NC(=O)[C@H](Cc1ccc(O)cc1)NC(=O)[C@H](CO)NC(...'' <Preview truncated at 128 characters>'	0.238108	0.277547
'A11'	'BRD-K61443506-001-01-0'	'Vitas-M'	'STK623746'	[]	'COc1ccc2[nH]c(nc2c1)[S@@](=O)Cc1ncc(C)c(OC)c1C'	0.0531099	0.073606
'A12'	'BRD-A87673115-001-01-7'	'AKSci'	[]	'Moguisteine'	'CCOC(=O)CC(=O)N1CCSC1COc1ccccc1OC'	0.0312656	0.0239297
'B12'	'BRD-M14820059-001-04-0'	'Selleck'	'S1224'	'Eloxatin'	'O=C1O[Pt]OC1=O.N[C@@H]1CCCC[C@H]1N'	0.0237031	-0.0147835
'C12'	'BRD-K37694030-003-08-5'	'AKSci'	'H882'	'Doxepin HCl'	'CN(C)CC\C=C1\c2ccccc2COc2ccccc12'	0.40561	0.65124
'D12'	'BRD-K56343971-001-05-6'	'Sequoia'	'S1267'	'Vemurafenib'	'CCCS(=O)(=O)Nc1ccc(F)c(C(=O)c2c[nH]c3ncc(cc23)-c2ccc(Cl)cc2)c1F'	0.046654	0.0202488
'E12'	'BRD-K49372556-001-02-5'	'ChemDiv'	'3337-1640'	[]	'COc1ccc(cc1)-c1noc(CC(O)=O)c1-c1ccc(OC)cc1'	0.0374605	-0.0592758
'F12'	'BRD-K19687926-379-02-5'	'Selleck'	'S1028'	'Lapatinib Ditosylate'	'CS(=O)(=O)CCNCc1ccc(o1)-c1ccc2ncnc(Nc3ccc(OCc4cccc(F)c4)c(Cl)c3)c2c1'	0.041505	-0.00946232
'G12'	'BRD-K82143716-001-15-7'	'ChemDiv'	'0NES-0030'	[]	'Nc1nc(=O)[nH]cc1F'	0.0280581	0.00185522
'H12'	'BRD-K23620883-001-01-3'	'Enamine'	'Z183600048'	[]	'CCCCNC(=O)c1ccc(Cl)cc1O'	0.056926	0.0493426
'I12'	'BRD-K90137436-001-01-8'	'Enamine'	'Z57046959'	[]	'OC(=O)Cc1csc(n1)-c1ccc(Cl)cc1'	0.0380288	-0.0456234
'J12'	'BRD-K77245796-001-19-2'	'Enamine'	'Z104475620'	[]	'NCCCC(O)=O'	0.0352465	-0.0394512
'K12'	'BRD-A19053834-050-06-1'	'Sigma'	'O111'	'Octoclothepin maleate salt'	'CN1CCN(CC1)C1Cc2ccccc2Sc2ccc(Cl)cc12'	0.0531646	0.0535255
'L12'	'BRD-A05566309-001-01-8'	'InterBioScreen'	'STOCK1S-06803'	[]	'COc1ccc(cc1OC)C(C#N)C(C)C'	0.0415351	0.0905557
'M12'	'BRD-K11626735-318-02-0'	'MicroSource'	[]	'CARBOPLATIN'	'O=C1O[Pt]OC(=O)C11CCC1'	0.336207	0.722158
'N12'	'BRD-K33852358-001-06-5'	'Maybridge'	'KM09088'	[]	'CCCn1c(=O)n(-c2ccc(Cl)cc2)c2[nH]cnc2c1=O'	0.0632573	0.0954914
'O12'	'BRD-K77625799-001-01-0'	'Sequoia'	'SRP0098ov'	'Vandetinib (SRP0098ov)'	'COc1cc2c(Nc3ccc(Br)cc3F)ncnc2cc1OCC1CCN(C)CC1'	0.0312538	-0.0546612
'P12'	'BRD-A84389633-001-03-2'	'ChemDiv'	'0908-0110'	[]	'CN1C2CCC1CC(C2)OC(=O)c1cc(C)cc(C)c1'	0.156769	0.301635
'P13'	'BRD-A02542241-065-01-8'	'Abblis'	'AB2000008'	'Indinavir'	'CC(C)(C)NC(=O)[C@@H]1CN(Cc2cccnc2)CCN1C[C@@H](O)C[C@@H](Cc1ccccc1)C(=O)NC1[C@@H](O)Cc2ccccc12'	0.0408913	0.0441481
'O13'	'BRD-K64273664-001-01-6'	'InterBioScreen'	'STOCK5S-48788'	[]	'CC(C)(C)CC(C)(C)c1ccc(O)cc1'	0.0722324	0.115745
'N13'	'BRD-A82772293-001-01-6'	'ChemDiv'	'S008-0093'	[]	'CN1CCCC(CN2c3ccccc3Sc3ccccc23)C1'	0.0617133	0.105137
'M13'	'BRD-K10415035-001-01-0'	'Vitas-M'	'STK829713'	[]	'C(Sc1ncccn1)c1cccnc1'	0.0421348	-0.0896144
'L13'	'BRD-K71059170-001-08-2'	'Toronto'	'C242800'	'Cefixime'	'Nc1nc(cs1)C(=N\OCC(O)=O)\C(=O)N[C@H]1[C@H]2SCC(C=C)=C(N2C1=O)C(O)=O'	0.0496381	-0.0945822
'K13'	'BRD-K12994359-001-14-3'	'Toronto'	'V090000'	'Valdecoxib'	'Cc1onc(c1-c1ccc(cc1)S(N)(=O)=O)-c1ccccc1'	0.0614352	0.0489216
'J13'	'BRD-A11725667-003-01-4'	'LifeChem'	'F3314-0027'	[]	'OC(COC1(CCCCC1)C#C)CN1CCN(CC1)c1cccc(c1)C(F)(F)F'	0.232954	0.296728
'I13'	'BRD-K98822077-001-01-1'	'Enamine'	'Z16189275'	[]	'COC(=O)c1cc(Cl)ccc1OC'	0.0209842	-0.000687131
'H13'	'BRD-K46209126-001-01-5'	'Axon'	[]	'(4-Methoxy-phenyl)-[2-methyl-1-(2-morpholin-4-yl-ethyl)-1H-indol-3-yl]-methanone'	'COc1ccc(cc1)C(=O)c1c(C)n(CCN2CCOCC2)c2ccccc12'	0.0512667	0.0589088
'G13'	'BRD-A25950209-003-12-4'	'Enamine'	'Z728800606'	[]	'CN(C)[C@H]1C2[C@@H](O)C3C(C(=O)c4c(O)cccc4[C@@]3(C)O)C(=O)[C@]2(O)C(=O)C(C(N)=O)C1=O'	0.0336117	0.019253
'F13'	'BRD-K03659283-001-01-1'	'InterBioScreen'	'STOCK1N-66141'	[]	'COc1ccc(cc1O)-c1cc(=O)c2c(O)cc(O[C@@H]3O[C@@H](CO[C@@H]4O[C@H](C)[C@@H](O)[C@H](O)[C@H]4O)[C@H](O)[C@@H](O)[C@H]3O)cc2o1'	0.0765543	-0.203154
'E13'	'BRD-K07441213-001-14-8'	'Enamine'	'Z104499156'	[]	'CCC(=O)c1ccc(O)cc1'	0.0380078	-0.0882289
'D13'	'BRD-A04352665-001-02-0'	'Toronto'	'M193000'	'Maraviroc'	'CC(C)c1nnc(C)n1C1CC2CCC(C1)N2CC[C@H](NC(=O)C1CCC(F)(F)CC1)c1ccccc1'	0.0544567	0.0556602
'C13'	'BRD-K18362446-001-06-8'	'InterBioScreen'	'STOCK6S-87165'	[]	'Oc1ccccc1-c1nnco1'	0.0455137	-0.0153937
'B13'	'BRD-K70369756-001-01-3'	'Sigma'	'T6515'	'Cholecystokinin Fragment 30-33 Amide'	'CSCC[C@H](NC(=O)[C@@H](N)Cc1c[nH]c2ccccc12)C(=O)N[C@@H](CC(O)=O)C(=O)N[C@@H](Cc1ccccc1)C(N)=O'	0.0258372	0.0321727
'A13'	'BRD-A90695733-001-01-7'	'Vitas-M'	'STK635322'	[]	'COC(=O)C1=C(C)NC(C)=C(C1c1cccc(c1)[N+]([O-])=O)C(=O)OCCN1CCN(CC1)C(c1ccccc1)c1ccccc1'	0.052988	-0.0104365
'A14'	'BRD-A69051038-001-01-2'	'AKSci'	'M523'	'gamma-Oryzanol'	'COc1cc(ccc1O)\C=C\C(=O)O[C@H]1CC[C@]23CC22CC[C@]4(C)[C@H](CC[C@@]4(C)C2CCC3C1(C)C)C(C)CCC=C(C)C'	0.0943471	0.0548457
'B14'	'BRD-K39974922-001-02-7'	'Selleck'	'S1164'	'E7080; Lenvatinib'	'COc1cc2nccc(Oc3ccc(NC(=O)NC4CC4)c(Cl)c3)c2cc1C(N)=O'	0.0403858	-0.0516306
'C14'	'BRD-K15646852-001-01-5'	'Axon'	[]	'N-(1-{3-[(R)-1-Benzoyl-3-(3,4-dichloro-phenyl)-piperidin-3-yl]-propyl}-4-phenyl-piperidin-4-yl)-N-methyl-acetamide'	'CN(C(C)=O)C1(CCN(CCC[C@@]2(CCCN(C2)C(=O)c2ccccc2)c2ccc(Cl)c(Cl)c2)CC1)c1ccccc1'	0.233983	0.186653
'D14'	'BRD-K88025533-003-01-7'	'Selleck'	'S5002'	'FTY720'	'CCCCCCCCc1ccc(CCC(N)(CO)CO)cc1'	0.057496	0.107886
'E14'	'BRD-K97742629-001-01-5'	'Maybridge'	'SB01472'	[]	'CC(=O)c1ccc(O)c(c1)C(N)=O'	0.0301914	0.0522926
'F14'	'BRD-K92441787-001-02-5'	'LCLabs'	'B-2422'	'Bexarotene'	'Cc1cc2c(cc1C(=C)c1ccc(cc1)C(O)=O)C(C)(C)CCC2(C)C'	0.123714	0.0543818
'G14'	'BRD-K49134924-001-06-5'	'Specs'	'AQ-405/42300515'	[]	'OC(=O)c1cn(-c2ccc(F)cc2)c2cc(Cl)c(F)cc2c1=O'	0.0593864	0.117959
'H14'	'BRD-K32318651-001-17-9'	'ChemDiv'	'1544-0050'	[]	'Nc1nc2n(COCCO)cnc2c(=O)[nH]1'	0.0788655	0.103064
'I14'	'BRD-K29585173-236-01-3'	'InterBioScreen'	'STOCK1N-16760'	[]	'Cc1onc(c1C(=O)N[C@H]1[C@@H]2SC(C)(C)[C@@H](N2C1=O)C(O)=O)-c1ccccc1'	0.0428614	0.058523
'J14'	'BRD-K45497328-001-01-3'	'Abblis'	'AB1011314'	'D-(-)-2-(2,5-dihydrophenyl)glycine'	'N[C@@H](C(O)=O)C1=CCC=CC1'	0.0420132	-0.00192295
'K14'	'BRD-K31339321-001-01-0'	'Axon'	[]	'Methanesulfonic acid 2-(2,4-dichloro-benzoyl)-3-ureido-benzofuran-6-yl ester'	'CS(=O)(=O)Oc1ccc2c(NC(N)=O)c(oc2c1)C(=O)c1ccc(Cl)cc1Cl'	0.0443685	0.030119
'L14'	'BRD-A50922295-003-01-9'	'Toronto'	'V092000'	'Valganciclovir Hydrochloride'	'CC(C)[C@H](N)C(=O)OCC(CO)OCn1cnc2c1nc(N)[nH]c2=O'	0.0375546	0.0100622
'M14'	'BRD-A28746609-001-02-4'	'MicroSource'	[]	'PACLITAXEL'	'''CC(=O)O[C@@H]1C2=C(C)[C@H](C[C@@](O)([C@@H](OC(=O)c3ccccc3)C3[C@@]4(CO[C@@H]4C[C@H](O)[C@@]3(C)C1=O)OC(C)=O)C2(C)C)OC(=O)[C@H](O...'' <Preview truncated at 128 characters>'	0.0428912	0.00698649
'N14'	'BRD-K22009844-001-09-1'	'AKSci'	'K108'	'Phenprobamate'	'NC(=O)OCCCc1ccccc1'	0.0371208	0.022315
'O14'	'BRD-K24844714-001-02-1'	'MicroSource'	[]	'FLUOROURACIL'	'Fc1c[nH]c(=O)[nH]c1=O'	0.0311307	0.0148132
'P14'	'BRD-K61868322-051-01-5'	'Abblis'	'AB2000088'	'Tenofovir Disoproxil Fumarate'	'CC(C)OC(=O)OCOP(=O)(CO[C@H](C)Cn1cnc2c(N)ncnc12)OCOC(=O)OC(C)C'	0.0400096	-0.0136082
'P15'	'BRD-K42828737-044-04-1'	'AKSci'	'V2095'	'Sunitinib malate'	'CCN(CC)CCNC(=O)c1c(C)[nH]c(\C=C2/C(=O)Nc3ccc(F)cc23)c1C'	0.0565503	0.0560191
'O15'	'BRD-A46641338-323-01-3'	'Sigma'	[]	'Salinomycin monosodium salt hydrate'	'''CC[C@H]([C@H]1CC[C@H](C)[C@@H](O1)[C@@H](C)[C@H](O)[C@H](C)C(=O)[C@H](CC)[C@H]1O[C@@]2(O[C@@]3(CC[C@](C)(O3)C3CC[C@](O)(CC)[C@H]...'' <Preview truncated at 128 characters>'	0.268431	0.30317
'N15'	'BRD-A91386192-001-04-0'	'Toronto'	'T892000'	'Trofosfamide'	'ClCCN(CCCl)P1(=O)OCCCN1CCCl'	0.0230871	0.029012
'M15'	'BRD-K58160573-001-01-3'	'Selleck'	'S1548'	'Dapagliflozin'	'CCOc1ccc(Cc2cc(ccc2Cl)[C@@H]2O[C@H](CO)[C@@H](O)[C@H](O)[C@H]2O)cc1'	0.0365419	0.041796
'L15'	'BRD-K29113274-001-21-8'	'Sigma'	'UC280'	'Ketoconazole'	'CC(=O)N1CCN(CC1)c1ccc(OC[C@H]2CO[C@@](Cn3ccnc3)(O2)c2ccc(Cl)cc2Cl)cc1'	0.0425629	0.0279032
'K15'	'BRD-K91100918-001-01-2'	'Sigma'	'S8559'	'Sinefungin'	'N[C@@H](CC[C@H](N)C(O)=O)C[C@H]1O[C@H]([C@H](O)[C@@H]1O)n1cnc2c(N)ncnc12'	0.0699204	-0.122134
'J15'	'BRD-A07780951-001-06-3'	'Toronto'	'M225835'	'Metaproterenol Hemisulfate Salt'	'CC(C)NCC(O)c1cc(O)cc(O)c1'	0.0493174	0.0623608
'I15'	'BRD-A14458579-001-08-5'	'Enamine'	'Z90122662'	[]	'CC12CCC3C(CCc4cc(O)ccc34)C1CCC2=O'	0.0246174	-0.0163367
'H15'	'BRD-K81881550-001-01-2'	'Enzo'	'ALX-550-228'	'5-Nitro-6,7-dichloro-1,4-dihydro-2,3-quinoxalinedione'	'[O-][N+](=O)c1c(Cl)c(Cl)cc2[nH]c(=O)c(=O)[nH]c12'	0.0615505	0.148631
'G15'	'BRD-A67370915-001-01-6'	'InterBioScreen'	'STOCK1N-34277'	[]	'CN(C)[C@H]1[C@@H]2C[C@H]3C(C(=O)c4c(O)cccc4[C@]3(C)O)C(=O)[C@]2(O)C(=O)C(C(N)=O)C1=O'	0.0323928	-0.0822424
'F15'	'BRD-K91188791-001-12-6'	'Cayman'	[]	[]	'CCOC(=O)[C@H]1O[C@@H]1C(=O)N[C@@H](CC(C)C)C(=O)NCCC(C)C'	0.156415	0.0596595
'E15'	'BRD-K36998189-001-01-9'	'Enamine'	'Z104477754'	[]	'OC(=O)c1ccccc1S'	0.0378301	-0.0831695
'D15'	'BRD-K52097716-001-01-1'	'Sigma'	'T8806'	'Thymopentin'	'CC(C)[C@H](NC(=O)[C@H](CC(O)=O)NC(=O)[C@H](CCCCN)NC(=O)[C@@H](N)CCCNC(N)=N)C(=O)N[C@@H](Cc1ccc(O)cc1)C(O)=O'	0.0320982	0.0233802
'C15'	'BRD-K48779954-001-01-2'	'Enamine'	'Z82931631'	[]	'COc1cc(C=CC(=O)N2CCN(CC(=O)NC(C)C)CC2)cc(OC)c1OC'	0.044918	0.0842483
'B15'	'BRD-A11662333-001-01-7'	'TCI'	'M0396'	'3-Methyl-1-pentyn-3-ol'	'CCC(C)(O)C#C'	0.0099213	-0.0114719
'A15'	'BRD-K80403280-001-01-3'	'Sigma'	[]	[]	'C[C@H](N)C(=O)N[C@@H](C)P(O)(O)=O'	0.0258901	0.0341127
'A16'	'BRD-K86204871-001-13-9'	'AKSci'	'K117'	'Terconazole'	'CC(C)N1CCN(CC1)c1ccc(OC[C@H]2CO[C@@](Cn3cncn3)(O2)c2ccc(Cl)cc2Cl)cc1'	0.0825142	0.0742659
'B16'	'BRD-K49328571-001-05-1'	'Selleck'	'S1021'	'Dasatinib'	'Cc1nc(Nc2ncc(s2)C(=O)Nc2c(C)cccc2Cl)cc(n1)N1CCN(CCO)CC1'	0.250421	0.519689
'C16'	'BRD-K47679368-323-01-3'	'AKSci'	'R722'	[]	'Nc1c(CC(O)=O)cccc1C(=O)c1ccc(Br)cc1'	0.0559629	-0.035826
'D16'	'BRD-K59456551-001-11-9'	'Selleck'	'S1210'	'Abitrexate(Methotrexate)'	'CN(Cc1cnc2nc(N)nc(N)c2n1)c1ccc(cc1)C(=O)N[C@@H](CCC(O)=O)C(O)=O'	0.0239235	0.0119031
'E16'	'BRD-K91586448-001-01-1'	'ChemDiv'	'1571-0026'	[]	'CN(C)CCOC(=O)c1ccc2n(Cc3ccccc3)c(C)c(C)c2c1'	0.0198014	-0.0170545
'F16'	'BRD-K37798499-001-10-8'	'Selleck'	'S1225'	'Etoposide'	'COc1cc(cc(OC)c1O)[C@H]1[C@@H]2[C@H](COC2=O)[C@H](O[C@@H]2O[C@@H]3CO[C@@H](C)O[C@H]3[C@H](O)[C@H]2O)c2cc3OCOc3cc12'	0.0276706	-0.0323109
'G16'	'BRD-K83382329-001-06-8'	'Specs'	'AC-509/25001342'	[]	'COc1ccc(cc1)[C@@H]1Sc2ccccc2NC(=O)[C@@H]1O'	0.0355816	-0.0783687
'H16'	'BRD-A39172021-001-06-1'	'Toronto'	'A634350'	'Ampiroxicam'	'CCOC(=O)OC(C)OC1=C(N(C)S(=O)(=O)c2ccccc12)C(=O)Nc1ccccn1'	0.0279235	0.0646893
'I16'	'BRD-K71075093-001-01-7'	'AlfaAesar'	'H27729'	'1,2,2,6,6-Pentamethylpiperidine, 97%'	'CN1C(C)(C)CCCC1(C)C'	0.0398245	0.00513548
'J16'	'BRD-K44779798-001-06-5'	'Abblis'	'AB2000682'	'Miglitol'	'OCCN1C[C@H](O)[C@@H](O)[C@H](O)[C@H]1CO'	0.0286424	-0.0107283
'K16'	'BRD-K91940914-001-01-5'	'Cayman'	[]	[]	'''CCCCC[C@@H](O)[C@@H]1[C@@H](O)C[C@@H](O)C[C@@H](O)C[C@@H](O)C[C@@H](O)C[C@@H](O)C[C@H](O)\C(C)=C\C=C\C=C\C=C\C=C\[C@H](O)[C@@H](...'' <Preview truncated at 128 characters>'	0.0446171	0.0062781
'L16'	'BRD-K23984367-001-01-8'	'International'	[]	'Sorafenib (4118182)'	'CNC(=O)c1cc(Oc2ccc(NC(=O)Nc3ccc(Cl)c(c3)C(F)(F)F)cc2)ccn1'	0.226566	0.134431
'M16'	'BRD-K89732114-001-05-9'	'Toronto'	'T779200'	'trifluoperazine'	'CN1CCN(CCCN2c3ccccc3Sc3ccc(cc23)C(F)(F)F)CC1'	0.392737	0.675385
'N16'	'BRD-K93754473-048-04-6'	'MicroSource'	[]	'TAMOXIFEN CITRATE'	'CC\C(c1ccccc1)=C(/c1ccccc1)c1ccc(OCCN(C)C)cc1'	0.0271509	-0.0256646
'O16'	'BRD-K13044802-213-04-1'	'MicroSource'	[]	'CICLOPIROX OLAMINE'	'Cc1cc(C2CCCCC2)n(O)c(=O)c1'	0.0513907	0.0579711
'P16'	'BRD-K00673382-001-13-0'	'AKSci'	'K328'	'Famotidine'	'NC(N)=Nc1nc(CSCC\C(N)=N/S(N)(=O)=O)cs1'	0.0843487	0.00743857
'P17'	'BRD-A89082344-001-02-0'	'Ark'	'AK-48419'	'1,1-Dimethylpiperidin-1-ium-4-yl octadecyl phosphate'	'CCCCCCCCCCCCCCCCCCOP(O)(=O)OC1CC[N+](C)(C)CC1'	0.0693902	0.167342
'O17'	'BRD-K34619475-001-01-6'	'InterBioScreen'	'STOCK5S-98610'	[]	'OC1(CCNCC1)c1ccc(Cl)cc1'	0.0580654	0.0646086
'N17'	'BRD-A51747092-003-01-4'	'LifeChem'	'F3314-0163'	[]	'COc1ccccc1OCC(O)CNC(C)C'	0.0434527	0.0187929
'M17'	'BRD-A65615053-311-05-2'	'Sigma'	'SML0081'	'Zacopride hydrochloride hydrate'	'COc1cc(N)c(Cl)cc1C(=O)NC1CN2CCC1CC2'	0.0438337	-0.067906
'L17'	'BRD-K20745393-001-01-4'	'Toronto'	'L469530'	'Loprinone Hydrochloride'	'Cc1[nH]c(=O)c(cc1-c1ccc2nccn2c1)C#N'	0.0316703	-0.0259732
'K17'	'BRD-A68360487-003-01-0'	'Toronto'	'A802800'	'Azasetron Hydrochloride'	'CN1C(=O)COc2c1cc(Cl)cc2C(=O)NC1CN2CC[C@H]1CC2'	0.0734255	-0.093105
'J17'	'BRD-A76954300-001-01-9'	'ChemDiv'	'5181-0657'	[]	'CC1OC(CC(N)C1O)OC1CC(O)(Cc2c(O)c3C(=O)c4cccc(O)c4C(=O)c3c(O)c12)C(C)=O'	0.0596084	-0.110383
'I17'	'BRD-K74060837-001-01-7'	'Enamine'	'Z68159798'	[]	'Oc1ccc(CCNC(=O)C23CC4CC(CC(C4)C2)C3)cc1O'	0.0361419	-0.0129948
'H17'	'BRD-K11632748-001-02-5'	'Enzo'	'BML-EI113'	'Acivicin'	'N[C@@H]([C@@H]1CC(Cl)=NO1)C(O)=O'	0.020833	0.0217362
'G17'	'BRD-K00019835-001-01-4'	'Enamine'	'Z168362628'	[]	'CN1N=C(CCC1=O)C(N)=O'	0.0140198	-0.0128476
'F17'	'BRD-K14551499-001-01-7'	'Cayman'	[]	[]	'CS(=O)(=O)NC(=O)CCC\C=C/C[C@@H]1[C@@H](\C=C\[C@@H](O)COc2ccccc2)[C@H](O)CC1=O'	0.0477523	-0.0457054
'E17'	'BRD-A65243462-001-07-1'	'Enamine'	'Z56933708'	[]	'CN1C(CC(O)c2ccccc2)CCCC1CC(=O)c1ccccc1'	0.123944	0.0992381
'D17'	'BRD-K52735702-001-02-0'	'Toronto'	'C242670'	'Cefdinir'	'Nc1nc(cs1)C(=N/O)\C(=O)N[C@H]1[C@H]2SCC(C=C)=C(N2C1=O)C(O)=O'	0.050141	0.00035959
'C17'	'BRD-K57215854-001-01-6'	'Enamine'	'Z317100312'	[]	'O=C1N(CCCN2CCN(CC2)c2ncccn2)S(=O)(=O)c2ccccc12'	0.0207959	0.0122297
'B17'	'BRD-K27872644-001-01-6'	'Enamine'	'Z445223816'	[]	'CCCc1ncc(s1)C(O)=O'	0.0369317	0.0122557
'A17'	'BRD-K08177763-001-02-6'	'Selleck'	'S1044'	'temsirolimus'	'''CO[C@@H]1C[C@H](C[C@@H](C)[C@@H]2CC(=O)[C@H](C)\C=C(C)\[C@@H](O)[C@@H](OC)C(=O)[C@H](C)C[C@H](C)\C=C\C=C\C=C(C)\[C@H](C[C@@H]3CC...'' <Preview truncated at 128 characters>'	0.0465946	-0.0995776
'A18'	'BRD-A95340155-001-05-5'	'AKSci'	[]	'Methyclothiazide'	'CN1C(CCl)Nc2cc(Cl)c(cc2S1(=O)=O)S(N)(=O)=O'	0.0393672	0.0697828
'B18'	'BRD-K53972329-001-03-9'	'Selleck'	'S1378'	'INCB018424'	'N#CC[C@H](C1CCCC1)n1cc(cn1)-c1ncnc2[nH]ccc12'	0.0435209	0.0677594
'C18'	'BRD-K10990317-001-02-9'	'Enzo'	'BML-D108'	'Clothiapine'	'CN1CCN(CC1)C1=Nc2ccccc2Sc2ccc(Cl)cc12'	0.132906	0.228996
'D18'	'BRD-K50128260-001-01-6'	'Toronto'	'S435000'	'Sildenafil citrate'	'CCCc1nn(C)c2c1[nH]c(nc2=O)-c1cc(ccc1OCC)S(=O)(=O)N1CCN(C)CC1'	0.0478824	0.0889986
'E18'	'BRD-A57957888-001-06-4'	'Maybridge'	'AC10258'	[]	'CC(=O)NC1CCSC1=O'	0.0318951	0.0135755
'F18'	'BRD-K16730910-001-02-4'	'Selleck'	'S1178'	'BAY 73-4506(Regorafenib)'	'CNC(=O)c1cc(Oc2ccc(NC(=O)Nc3ccc(Cl)c(c3)C(F)(F)F)c(F)c2)ccn1'	0.0490823	-0.0136498
'G18'	'BRD-K54824716-001-01-6'	'Enamine'	'Z57115077'	[]	'OC(=O)CCc1nc2ccccc2[nH]1'	0.0456585	-0.0750653
'H18'	'BRD-K12754271-001-07-0'	'Enamine'	'Z754926484'	[]	'Cc1nccn1C[C@@H]1CCc2c(C1=O)c1ccccc1n2C'	0.081351	0.00843124
'I18'	'BRD-K96177243-002-01-9'	'Abblis'	'AB2000485'	'Cilazapril monohydrate'	'CCOC(=O)[C@H](CCc1ccccc1)N[C@H]1CCCN2CCC[C@H](N2C1=O)C(O)=O'	0.029258	-0.0348044
'J18'	'BRD-K70578146-001-04-2'	'Apollo'	'BIA0175'	[]	'''CC(C)[C@H]1NC(=O)[C@@H](NC(=O)c2ccc(C)c3oc4c(C)c(=O)c(N)c(C(=O)N[C@H]5[C@@H](C)OC(=O)[C@H](C(C)C)N(C)C(=O)CN(C)C(=O)[C@@H]6CCCN6...'' <Preview truncated at 128 characters>'	0.016497	-0.01407
'K18'	'BRD-K86887724-001-05-6'	'Abblis'	'AB2000201'	'Dofetilide'	'CN(CCOc1ccc(NS(C)(=O)=O)cc1)CCc1ccc(NS(C)(=O)=O)cc1'	0.0277971	0.0425089
'L18'	'BRD-A70579168-001-01-1'	'PrincetonBio'	'OSSL_138101'	[]	'COC1\C=C\OC2(C)Oc3c(C2=O)c2c(C(=O)C(NC(=O)\C(C)=C/C=C/C(C)C(O)C(C)C(O)C(C)C(OC(C)=O)C1C)=CC21OCC(=O)O1)c(O)c3C'	0.0389166	0.0228709
'M18'	'BRD-K22134346-001-11-6'	'MicroSource'	[]	'SIMVASTATIN'	'CCC(C)(C)C(=O)O[C@H]1C[C@@H](C)C=C2C=C[C@H](C)[C@H](CC[C@@H]3C[C@@H](O)CC(=O)O3)[C@@H]12'	0.0266507	-0.0138341
'N18'	'BRD-A31811760-002-01-6'	'Sigma'	'M9198'	'Miltefosine hydrate'	'CCCCCCCCCCCCCCCCOP(O)(=O)OCC[N+](C)(C)C'	0.0369355	-0.0464187
'O18'	'BRD-K19352500-070-05-8'	'MicroSource'	[]	'PROCHLORPERAZINE EDISYLATE'	'CN1CCN(CCCN2c3ccccc3Sc3ccc(Cl)cc23)CC1'	0.087169	0.118704
'P18'	'BRD-K92723993-066-02-9'	'International'	[]	'Imatinib (3524741)'	'CN1CCN(Cc2ccc(cc2)C(=O)Nc2ccc(C)c(Nc3nccc(n3)-c3cccnc3)c2)CC1'	0.0465583	0.0682143
'P19'	'BRD-M02269257-001-01-0'	'AKSci'	'H669'	'Polaprezinc'	'[Zn+3].NCCC(=O)N[C@@H](Cc1cnc[nH]1)C(O)=O'	0.0665395	0.0985756
'O19'	'BRD-K56699285-001-18-5'	'Sigma'	'M3668'	'Metergoline'	'CN1C[C@H](CNC(=O)OCc2ccccc2)C[C@H]2[C@H]1Cc1cn(C)c3cccc2c13'	0.0737182	0.0981643
'N19'	'BRD-A83431637-001-02-1'	'PrincetonBio'	'OSSL_297716'	[]	'CC(C)=CC1C(C(=O)OCc2coc(Cc3ccccc3)c2)C1(C)C'	0.0594952	0.033863
'M19'	'BRD-A29281099-001-01-0'	'Sigma'	[]	'Clorprenaline'	'CC(C)NCC(O)c1ccccc1Cl'	0.0584658	0.101153
'L19'	'BRD-K52002287-001-01-0'	'Sigma'	[]	'Silydianin'	'COc1cc(ccc1O)[C@@H]1[C@H]2CO[C@]3(O)[C@H]2C(=C[C@H]1C3=O)[C@H]1Oc2cc(O)cc(O)c2C(=O)[C@@H]1O'	0.0331454	0.0437272
'K19'	'BRD-K16389764-001-01-8'	'Sigma'	[]	'Silychristin'	'COc1cc(ccc1O)[C@@H]1Oc2c(cc(cc2O)[C@H]2Oc3cc(O)cc(O)c3C(=O)[C@@H]2O)[C@H]1CO'	0.0330395	-0.0451837
'J19'	'BRD-A64187568-001-01-7'	'PrincetonBio'	'OSSL_149735'	[]	'OCC=C1OC2CC(=O)N2C1C(O)=O'	0.0322004	0.0445341
'I19'	'BRD-K24443618-001-08-6'	'Enamine'	'Z53036662'	[]	'CCN(CC)S(=O)(=O)c1ccc(cc1)C(O)=O'	0.101486	-0.143096
'H19'	'BRD-K43605761-003-05-4'	'Sigma'	'T103'	'Trifluperidol hydrochloride'	'OC1(CCN(CCCC(=O)c2ccc(F)cc2)CC1)c1cccc(c1)C(F)(F)F'	0.335306	0.580098
'G19'	'BRD-A96507338-001-01-7'	'InterBioScreen'	'STOCK1N-66429'	[]	'CC(C)(C)NC(=O)[C@H]1CCC2C3CC[C@H]4NC(=O)C=C[C@]4(C)C3CC[C@]12C'	0.0512311	0.100842
'F19'	'BRD-K17850764-236-08-5'	'Enzo'	'BML-RA106'	'Cloprostenol . sodium'	'O[C@@H](COc1cccc(Cl)c1)\C=C\[C@H]1[C@H](O)C[C@H](O)[C@@H]1C\C=C/CCCC(O)=O'	0.0393733	-0.0765216
'E19'	'BRD-K92426617-001-01-4'	'Enamine'	'Z234896745'	[]	'O=C(CN1CCNCC1)NC1CCCCC1'	0.0178893	-0.0264637
'D19'	'BRD-K66850609-001-01-7'	'Sigma'	[]	'Voglibose'	'OCC(CO)N[C@H]1C[C@](O)(CO)[C@@H](O)[C@H](O)[C@H]1O'	0.0180777	0.00139207
'C19'	'BRD-K17696061-001-01-5'	'Vitas-M'	'STK631371'	[]	'CN1C[C@H]2C[C@@H]1CN2c1cc2n(cc(C(O)=O)c(=O)c2cc1F)C1CC1'	0.0466928	0.0572412
'B19'	'BRD-A70220996-001-06-9'	'Toronto'	'B279020'	'Benzylhydrochlorothiazide'	'NS(=O)(=O)c1cc2c(NC(Cc3ccccc3)NS2(=O)=O)cc1Cl'	0.0260993	0.0440535
'A19'	'BRD-K38158531-001-01-3'	'Ark'	'AK-88574'	[]	'C[C@@H]([C@@H](O)c1ccc(O)cc1)N1CCC(O)(CC1)c1ccccc1'	0.0816803	0.111752
'A20'	'BRD-A04252265-001-01-8'	'AKSci'	[]	'Eperisone HCl'	'CCc1ccc(cc1)C(=O)C(C)CN1CCCCC1'	0.0716993	-0.0576827
'B20'	'BRD-K51544265-001-01-8'	'Selleck'	'S1119'	'XL184'	'COc1cc2nccc(Oc3ccc(NC(=O)C4(CC4)C(=O)Nc4ccc(F)cc4)cc3)c2cc1OC'	0.0324384	0.05262
'C20'	'BRD-K37872686-311-01-6'	'AKSci'	[]	'Tirofiban hydrochloride monohydrate'	'CCCCS(=O)(=O)N[C@@H](Cc1ccc(OCCCCC2CCNCC2)cc1)C(O)=O'	0.0538066	-0.0290404
'D20'	'BRD-K64634304-001-01-5'	'Sigma'	'R2625-50MG'	'Retinoic acid'	'CC(=CCO)C=CC=C(C)C=CC1=C(C)CCCC1(C)C'	0.0185898	-0.0161784
'E20'	'BRD-K55490269-001-01-6'	'ChemDiv'	'4364-0216'	[]	'COc1ccc2n3CCN(C)C4=NCCc(c34)c2c1'	0.0200814	-0.00649956
'F20'	'BRD-K70401845-003-04-7'	'Selleck'	'S1023'	'Erlotinib'	'COCCOc1cc2ncnc(Nc3cccc(c3)C#C)c2cc1OCCOC'	0.0592023	-0.019306
'G20'	'BRD-K70526448-001-02-0'	'Enamine'	'Z57131032'	[]	'O=C1CSC(=O)N1'	0.0131097	-0.00554844
'H20'	'BRD-A20119038-001-01-5'	'PrincetonBio'	'OSSL_297259'	[]	'CNC1(C)C2CCC(C2)C1(C)C'	0.0438395	0.0258171
'I20'	'BRD-A90799790-001-10-8'	'Abblis'	'AB2000202'	'Isradipine'	'COC(=O)C1=C(C)NC(C)=C(C1c1cccc2nonc12)C(=O)OC(C)C'	0.239716	0.314694
'J20'	'BRD-K79821389-001-01-9'	'Sigma'	'R3655'	'Rubitecan'	'CC[C@@]1(O)C(=O)OCc2c1cc1-c3nc4cccc([N+]([O-])=O)c4cc3Cn1c2=O'	0.0542595	0.0761894
'K20'	'BRD-K51474773-001-01-3'	'Abblis'	'AB2000093'	'Bimatoprost'	'CCNC(=O)CCCC=CC[C@H]1[C@@H](O)C[C@H](O)[C@H]1C=C[C@H](O)CCc1ccccc1'	0.134865	0.0755811
'L20'	'BRD-K15365721-001-01-1'	'AlfaAesar'	'B22663'	'Thiotriazinone, 98+%'	'Cn1[nH]c(=O)c(=O)[nH]c1=S'	0.0511691	0.0966557
'M20'	'BRD-K29905972-001-02-2'	'Axon'	[]	'AG-013736'	'CNC(=O)c1ccccc1Sc1ccc2c(\C=C\c3ccccn3)n[nH]c2c1'	0.0419969	0.0748885
'N20'	'BRD-K48282247-001-01-4'	'PrincetonBio'	'OSSK_580408'	[]	'CCN(CC)CCOC(=O)C(C)(c1ccccc1)c1ccccc1'	0.238144	0.441537
'O20'	'BRD-K69608737-001-03-7'	'MicroSource'	[]	'TACROLIMUS'	'''CO[C@@H]1C[C@@H](CC[C@H]1O)\C=C(/C)[C@H]1OC(=O)[C@@H]2CCCCN2C(=O)C(=O)[C@]2(O)O[C@@H]([C@H](C[C@H]2C)OC)[C@H](C[C@@H](C)C\C(C)=C...'' <Preview truncated at 128 characters>'	0.646048	0.31301
'P20'	'BRD-A76016358-001-01-8'	'ChemDiv'	'4120-0143'	[]	'COC(=O)c1cncn1C(C)c1ccccc1'	0.0342185	-0.0290835
'P21'	'BRD-A45929034-001-06-1'	'Maybridge'	'BTB14642'	[]	'O=C(OC1CN2CCC1CC2)c1ccccc1'	0.0403032	0.0702168
'O21'	'BRD-K48252171-001-01-7'	'InterBioScreen'	'STOCK5S-98130'	[]	'COc1cc2CCC(=O)c2cc1OC'	0.0252358	0.00300523
'N21'	'BRD-K04184784-001-05-4'	'ChemDiv'	'0195-0043'	[]	'NS(=O)(=O)c1ccc(Cl)c(c1)S(N)(=O)=O'	0.0300256	0.00590951
'M21'	'BRD-A61676498-001-01-7'	'Toronto'	'C578500'	'Climbazole'	'CC(C)(C)C(=O)C(Oc1ccc(Cl)cc1)n1ccnc1'	0.0802256	0.132455
'L21'	'BRD-A42270467-001-02-8'	'Toronto'	'T018250'	'Tenatoprazole'	'COc1ccc2[nH]c(nc2n1)S(=O)Cc1ncc(C)c(OC)c1C'	0.0259585	0.047668
'K21'	'BRD-K54770957-001-02-7'	'Toronto'	'E934100'	'Etoricoxib'	'Cc1ccc(cn1)-c1ncc(Cl)cc1-c1ccc(cc1)S(C)(=O)=O'	0.0303738	0.0379262
'J21'	'BRD-A32634804-300-01-7'	'LifeChem'	'F3314-0020'	[]	'COc1ccccc1N1CCN(CC(O)COC2(CCCCC2)C#C)CC1'	0.1672	0.258726
'I21'	'BRD-A49358627-001-10-4'	'Vitas-M'	'STK624758'	[]	'CC(C)(Oc1ccc(cc1)C1CC1(Cl)Cl)C(O)=O'	0.0397681	-0.00751834
'H21'	'BRD-K28761891-001-04-4'	'Selleck'	'S1259'	'Ramelteon (TAK-375)'	'CCC(=O)NCC[C@@H]1CCc2ccc3OCCc3c12'	0.0427473	0.0207147
'G21'	'BRD-K68264559-001-10-0'	'Enamine'	'Z608061562'	[]	'Brc1c(NC2=NCCN2)ccc2nccnc12'	0.0389292	0.00465293
'F21'	'BRD-K04112579-001-02-1'	'Selleck'	'S1255'	'Nepafenac'	'NC(=O)Cc1cccc(C(=O)c2ccccc2)c1N'	0.0870183	0.101279
'E21'	'BRD-K77219267-001-01-5'	'Enamine'	'Z759291656'	[]	'CCOC(=O)[C@@H](CCc1ccccc1)N[C@H](C)C(=O)N1[C@@H]2CCC[C@H]2C[C@H]1C(O)=O'	0.0254144	-0.00104677
'D21'	'BRD-K96862998-001-09-8'	'Toronto'	'M325896'	'5-Methyl-N-phenyl-2-1H-pyridone [Pirfenidone]'	'Cc1ccc(=O)n(c1)-c1ccccc1'	0.0483589	0.0409526
'C21'	'BRD-K78712176-001-07-5'	'Vitas-M'	'STL146415'	[]	'C[C@@](Cc1ccc(O)c(O)c1)(NN)C(O)=O'	0.0574809	0.13726
'B21'	'BRD-K54833908-001-01-5'	'Enamine'	'Z104474290'	[]	'COC(=O)Cc1cccn1C'	0.0491255	0.0771325
'A21'	'BRD-K57110268-001-01-9'	'InterBioScreen'	'STOCK1N-07057'	[]	'Cc1nnc(SCC2=C(N3[C@H](SC2)[C@H](N)C3=O)C(O)=O)s1'	0.0467387	0.0482572
'A22'	'BRD-A96510685-213-01-1'	'AKSci'	'O639'	'Piroctone olamine'	'CC(Cc1cc(C)cc(=O)n1O)CC(C)(C)C'	0.0456095	-0.0511684
'B22'	'BRD-K84937637-001-06-5'	'Selleck'	'S1039'	'Sirolimus'	'''CO[C@@H]1C[C@H](C[C@@H](C)[C@@H]2CC(=O)[C@H](C)\C=C(C)\[C@@H](O)[C@@H](OC)C(=O)[C@H](C)C[C@H](C)\C=C\C=C\C=C(C)\[C@H](C[C@@H]3CC...'' <Preview truncated at 128 characters>'	0.0290274	0.0379201
'C22'	'BRD-K42635745-001-22-2'	'Sigma'	'S9384'	'Suloctidil'	'CCCCCCCCN[C@H](C)[C@@H](O)c1ccc(SC(C)C)cc1'	0.057126	0.0929316
'D22'	'BRD-K74514084-003-02-7'	'Selleck'	'S1035'	'Pazopanib Hydrochloride'	'CN(c1ccc2c(C)n(C)nc2c1)c1ccnc(Nc2ccc(C)c(c2)S(N)(=O)=O)n1'	0.0348402	-0.00554246
'E22'	'BRD-K08404405-001-01-0'	'ChemDiv'	'0585-0732'	[]	'CCCOc1ccc2nc(NC(=O)OC)sc2c1'	0.0315495	0.0126938
'F22'	'BRD-A16444946-001-07-1'	'Vitas-M'	'STK801930'	[]	'''C[C@H]1O[C@H](O[C@@H]2[C@@H](CO)O[C@H](O[C@@H]3[C@@H](CO)OC(O)[C@H](O)[C@H]3O)[C@H](O)[C@H]2O)[C@H](O)[C@@H](O)[C@@H]1N[C@H]1C=C...'' <Preview truncated at 128 characters>'	0.0349667	-0.0361901
'G22'	'BRD-K01772856-003-01-7'	'ChemBridge'	[]	[]	'CN(Cc1ccccc1)Cc1ccccc1'	0.0236838	0.028622
'H22'	'BRD-K82357231-001-13-4'	'Vitas-M'	'STK586537'	[]	'Clc1ccc2c(CCc3cccnc3C2=C2CCNCC2)c1'	0.0381742	-0.00175416
'I22'	'BRD-K99567129-001-01-9'	'AKSci'	'L624'	'4-Amino-5,6-dimethoxypyrimidine'	'COc1ncnc(N)c1OC'	0.0317223	0.0203656
'J22'	'BRD-A09925278-001-07-6'	'Enamine'	'Z56836691'	[]	'CCNCC(O)c1cccc(O)c1'	0.0204821	0.0203787
'K22'	'BRD-K85490921-001-01-0'	'Abblis'	'AB2000281'	'Cefditoren pivoxil'	'CON=C(C(=O)N[C@H]1[C@H]2SCC(C=Cc3scnc3C)=C(N2C1=O)C(=O)OCOC(=O)C(C)(C)C)c1csc(N)n1'	0.0413541	0.0577608
'L22'	'BRD-M74315342-001-01-1'	'InterBioScreen'	'STOCK1N-00453'	[]	'CCCCN(CCCC)CCCC.Nc1ncnc2n(cnc12)C1OC(COP(O)(O)=O)C(O)C1O'	0.0269802	0.0326349
'M22'	'BRD-K29458283-001-04-2'	'MicroSource'	[]	'CHLORAMBUCIL'	'OC(=O)CCCc1ccc(cc1)N(CCCl)CCCl'	0.0397893	-0.053424
'N22'	'BRD-K63900402-001-01-2'	'Vitas-M'	'STK022553'	[]	'CC(C)NC[C@@H](O)c1ccc(NS(C)(=O)=O)cc1'	0.0552116	0.0788582
'O22'	'BRD-K35960502-001-11-9'	'Sigma'	'N3510'	'niclosamide'	'Oc1ccc(Cl)cc1C(=O)Nc1ccc(cc1Cl)[N+]([O-])=O'	0.167317	0.417001
'P22'	'BRD-K97427848-001-01-8'	'Acros'	[]	'Ethyl 2-(formylamino)-4-thiazoleglyoxylate, 99%'	'CCOC(=O)C(=O)c1csc(NC=O)n1'	0.0383393	0.0830889
'P23'	'Amitryptyline'	[]	[]	[]	[]	0.333045	0.330575
'O23'	'Amitryptyline'	[]	[]	[]	[]	0.319962	0.802215
'N23'	'Amitryptyline'	[]	[]	[]	[]	0.317634	0.697975
'M23'	'Amitryptyline'	[]	[]	[]	[]	0.324136	0.813469
'L23'	'Amitryptyline'	[]	[]	[]	[]	0.324718	0.794373
'K23'	'Amitryptyline'	[]	[]	[]	[]	0.361348	0.715771
'J23'	'Amitryptyline'	[]	[]	[]	[]	0.348571	0.798434
'I23'	'Amitryptyline'	[]	[]	[]	[]	0.311509	0.708511
'H23'	'DMSO'	[]	[]	[]	[]	0.0368084	-0.0114434
'G23'	'DMSO'	[]	[]	[]	[]	0.0620788	0.145501
'F23'	'DMSO'	[]	[]	[]	[]	0.0629163	0.116149
'E23'	'DMSO'	[]	[]	[]	[]	0.0726126	0.124083
'D23'	'DMSO'	[]	[]	[]	[]	0.0462986	0.104997
'C23'	'DMSO'	[]	[]	[]	[]	0.115777	0.16001
'B23'	'DMSO'	[]	[]	[]	[]	0.0701066	-0.0275786
'A23'	'DMSO'	[]	[]	[]	[]	0.0618288	0.0816819
